# Supplementary material
Source: publisher figshare collection journal article supplement (https://acs.figshare.com/ndownloader/files/4022698)
Supplement: Supplementary file 1 [file 4022698]

 
data_Moris-212 
 
_audit_creation_method            SHELXL-97 
_chemical_name_systematic 
; 
 ? 
; 
_chemical_name_common             'Moris-212 (Manab)'
_chemical_melting_point           ? 
_chemical_formula_moiety          ? 
_chemical_formula_sum 
 'C30 H40 Cl3 N3 Ti' 
_chemical_formula_weight          596.90 
 
loop_ 
 _atom_type_symbol 
 _atom_type_description 
 _atom_type_scat_dispersion_real 
 _atom_type_scat_dispersion_imag 
 _atom_type_scat_source 
 'Ti'  'Ti'   0.2776   0.4457 
 'International Tables Vol C Tables 4.2.6.8 and 6.1.1.4' 
 'Cl'  'Cl'   0.1484   0.1585 
 'International Tables Vol C Tables 4.2.6.8 and 6.1.1.4' 
 'N'  'N'   0.0061   0.0033 
 'International Tables Vol C Tables 4.2.6.8 and 6.1.1.4' 
 'C'  'C'   0.0033   0.0016 
 'International Tables Vol C Tables 4.2.6.8 and 6.1.1.4' 
 'H'  'H'   0.0000   0.0000 
 'International Tables Vol C Tables 4.2.6.8 and 6.1.1.4' 
 
_symmetry_cell_setting            Triclinic
_symmetry_space_group_name_H-M    'P -1'
 
loop_ 
 _symmetry_equiv_pos_as_xyz 
 'x, y, z' 
 '-x, -y, -z' 
 
_cell_length_a                    9.441(2) 
_cell_length_b                    9.489(2) 
_cell_length_c                    19.860(4) 
_cell_angle_alpha                 92.50(2) 
_cell_angle_beta                  95.35(3) 
_cell_angle_gamma                 112.65(3) 
_cell_volume                      1628.7(6) 
_cell_formula_units_Z             2 
_cell_measurement_temperature     240(2) 
_cell_measurement_reflns_used     20370 
_cell_measurement_theta_min       2.07 
_cell_measurement_theta_max       25.04 
 
_exptl_crystal_description        prism 
_exptl_crystal_colour             yellow 
_exptl_crystal_size_max           0.27 
_exptl_crystal_size_mid           0.15 
_exptl_crystal_size_min           0.05 
_exptl_crystal_density_meas       ? 
_exptl_crystal_density_diffrn     1.217 
_exptl_crystal_density_method     'not measured' 
_exptl_crystal_F_000              628 
_exptl_absorpt_coefficient_mu     0.531 
_exptl_absorpt_correction_type    none 
_exptl_absorpt_correction_T_min   ? 
_exptl_absorpt_correction_T_max   ? 
_exptl_absorpt_process_details    ? 
 
_exptl_special_details 
; 
 ? 
; 
 
_diffrn_ambient_temperature       240(2) 
_diffrn_radiation_wavelength      0.71073 
_diffrn_radiation_type            MoK\a 
_diffrn_radiation_source          'fine-focus sealed tube' 
_diffrn_radiation_monochromator   graphite 
_diffrn_measurement_device_type   'Nonius KappaCCD' 
_diffrn_measurement_method        'phi- and omega-scans' 
_diffrn_detector_area_resol_mean  ? 
_diffrn_standards_number          0 
_diffrn_standards_interval_count  ? 
_diffrn_standards_interval_time   ? 
_diffrn_standards_decay_%         ? 
_diffrn_reflns_number             20365 
_diffrn_reflns_av_R_equivalents   0.0755 
_diffrn_reflns_av_sigmaI/netI     0.0743 
_diffrn_reflns_limit_h_min        -11 
_diffrn_reflns_limit_h_max        11 
_diffrn_reflns_limit_k_min        -11 
_diffrn_reflns_limit_k_max        11 
_diffrn_reflns_limit_l_min        -23 
_diffrn_reflns_limit_l_max        23 
_diffrn_reflns_theta_min          2.07 
_diffrn_reflns_theta_max          25.04 
_reflns_number_total              5754 
_reflns_number_gt                 3550 
_reflns_threshold_expression      >2sigma(I) 
 
_computing_data_collection        'Collect (Nonius, 2006)'
_computing_cell_refinement        'DENZO HKL2000 (Otwinowski & Minor 1997)'
_computing_data_reduction         'DENZO HKL2000 (Otwinowski & Minor 1997)'
_computing_structure_solution     'SHELXS-97 (Sheldrick, 1997)'
_computing_structure_refinement   'SHELXL-97 (Sheldrick, 1997)'
_computing_molecular_graphics     'TEXSAN  (MSC, 1999)'
_computing_publication_material   ?
 
_refine_special_details 
; 
 Refinement of F^2^ against ALL reflections.  The weighted R-factor wR and 
 goodness of fit S are based on F^2^, conventional R-factors R are based 
 on F, with F set to zero for negative F^2^. The threshold expression of 
 F^2^ > 2sigma(F^2^) is used only for calculating R-factors(gt) etc. and is 
 not relevant to the choice of reflections for refinement.  R-factors based 
 on F^2^ are statistically about twice as large as those based on F, and R- 
 factors based on ALL data will be even larger. 
; 
 
_refine_ls_structure_factor_coef  Fsqd  
_refine_ls_matrix_type            full 
_refine_ls_weighting_scheme       calc  
_refine_ls_weighting_details 
 'calc w=1/[\s^2^(Fo^2^)+(0.0950P)^2^+0.0000P] where P=(Fo^2^+2Fc^2^)/3' 
_atom_sites_solution_primary      direct 
_atom_sites_solution_secondary    difmap 
_atom_sites_solution_hydrogens    geom 
_refine_ls_hydrogen_treatment     constr 
_refine_ls_extinction_method      none 
_refine_ls_extinction_coef        ? 
_refine_ls_number_reflns          5754 
_refine_ls_number_parameters      346 
_refine_ls_number_restraints      2 
_refine_ls_R_factor_all           0.0977 
_refine_ls_R_factor_gt            0.0529 
_refine_ls_wR_factor_ref          0.1559 
_refine_ls_wR_factor_gt           0.1399 
_refine_ls_goodness_of_fit_ref    0.918 
_refine_ls_restrained_S_all       0.919 
_refine_ls_shift/su_max           0.041 
_refine_ls_shift/su_mean          0.002 
 
loop_ 
 _atom_site_label 
 _atom_site_type_symbol 
 _atom_site_fract_x 
 _atom_site_fract_y 
 _atom_site_fract_z 
 _atom_site_U_iso_or_equiv 
 _atom_site_adp_type 
 _atom_site_occupancy 
 _atom_site_symmetry_multiplicity 
 _atom_site_calc_flag 
 _atom_site_refinement_flags 
 _atom_site_disorder_assembly 
 _atom_site_disorder_group 
Ti1 Ti 0.49962(7) -0.06901(7) 0.26071(3) 0.0403(2) Uani 1 1 d . . . 
Cl1 Cl 0.69641(12) -0.06975(14) 0.33291(6) 0.0734(4) Uani 1 1 d . . . 
Cl2 Cl 0.28199(12) -0.25705(11) 0.28328(6) 0.0683(3) Uani 1 1 d . . . 
Cl3 Cl 0.53869(13) -0.10942(13) 0.15400(6) 0.0749(4) Uani 1 1 d . . . 
N1 N 0.4801(3) 0.1042(3) 0.27200(14) 0.0366(6) Uani 1 1 d . . . 
N2 N 0.4931(3) 0.3340(3) 0.33259(13) 0.0344(6) Uani 1 1 d . . . 
N3 N 0.3917(3) 0.2893(3) 0.22706(13) 0.0341(6) Uani 1 1 d . . . 
C1 C 0.4568(3) 0.2336(3) 0.27717(16) 0.0302(7) Uani 1 1 d . . . 
C2 C 0.4481(4) 0.4530(4) 0.31666(18) 0.0412(8) Uani 1 1 d . . . 
H2 H 0.4594 0.5376 0.3463 0.049 Uiso 1 1 calc R . . 
C3 C 0.3861(4) 0.4262(4) 0.25224(18) 0.0417(8) Uani 1 1 d . . . 
H3 H 0.3459 0.4882 0.2281 0.050 Uiso 1 1 calc R . . 
C4 C 0.5623(4) 0.3152(4) 0.39766(16) 0.0384(8) Uani 1 1 d . . . 
C5 C 0.4658(4) 0.2602(4) 0.44802(18) 0.0446(8) Uani 1 1 d . . . 
C6 C 0.5366(5) 0.2455(5) 0.5105(2) 0.0585(10) Uani 1 1 d . . . 
H6 H 0.4764 0.2099 0.5460 0.070 Uiso 1 1 calc R . . 
C7 C 0.6928(5) 0.2820(5) 0.5210(2) 0.0623(11) Uani 1 1 d . . . 
H7 H 0.7382 0.2715 0.5637 0.075 Uiso 1 1 calc R . . 
C8 C 0.7845(4) 0.3341(5) 0.4696(2) 0.0551(10) Uani 1 1 d . . . 
H8 H 0.8911 0.3574 0.4778 0.066 Uiso 1 1 calc R . . 
C9 C 0.7217(4) 0.3527(4) 0.40609(18) 0.0433(8) Uani 1 1 d . . . 
C10 C 0.2911(4) 0.2132(4) 0.4352(2) 0.0517(9) Uani 1 1 d . . . 
H10 H 0.2697 0.2630 0.3949 0.062 Uiso 1 1 calc R . . 
C11 C 0.2273(5) 0.2666(6) 0.4939(3) 0.0813(15) Uani 1 1 d . . . 
H11A H 0.1166 0.2357 0.4832 0.122 Uiso 1 1 calc R . . 
H11B H 0.2763 0.3774 0.5017 0.122 Uiso 1 1 calc R . . 
H11C H 0.2482 0.2211 0.5344 0.122 Uiso 1 1 calc R . . 
C12 C 0.2096(5) 0.0419(6) 0.4186(3) 0.105(2) Uani 1 1 d . . . 
H12A H 0.0991 0.0147 0.4099 0.157 Uiso 1 1 calc R . . 
H12B H 0.2314 -0.0104 0.4566 0.157 Uiso 1 1 calc R . . 
H12C H 0.2462 0.0115 0.3786 0.157 Uiso 1 1 calc R . . 
C13 C 0.8212(4) 0.4131(4) 0.35017(19) 0.0516(10) Uani 1 1 d . . . 
H13 H 0.7578 0.3643 0.3065 0.062 Uiso 1 1 calc R . . 
C14 C 0.8695(5) 0.5861(5) 0.3489(3) 0.0774(14) Uani 1 1 d . . . 
H14A H 0.9325 0.6217 0.3124 0.116 Uiso 1 1 calc R . . 
H14B H 0.9287 0.6371 0.3919 0.116 Uiso 1 1 calc R . . 
H14C H 0.7781 0.6094 0.3416 0.116 Uiso 1 1 calc R . . 
C15 C 0.9657(5) 0.3759(5) 0.3541(3) 0.0717(13) Uani 1 1 d . . . 
H15A H 1.0233 0.4168 0.3165 0.108 Uiso 1 1 calc R . . 
H15B H 0.9352 0.2656 0.3516 0.108 Uiso 1 1 calc R . . 
H15C H 1.0300 0.4216 0.3966 0.108 Uiso 1 1 calc R . . 
C16 C 0.3458(3) 0.2206(4) 0.15774(16) 0.0342(7) Uani 1 1 d . . . 
C17 C 0.1995(4) 0.1050(4) 0.14220(18) 0.0396(8) Uani 1 1 d . . . 
C18 C 0.1623(4) 0.0414(4) 0.0753(2) 0.0532(10) Uani 1 1 d . . . 
H18 H 0.0641 -0.0362 0.0617 0.064 Uiso 1 1 calc R . . 
C19 C 0.2658(5) 0.0892(5) 0.0284(2) 0.0613(11) Uani 1 1 d . . . 
H19 H 0.2379 0.0431 -0.0164 0.074 Uiso 1 1 calc R . . 
C20 C 0.4091(5) 0.2031(5) 0.0462(2) 0.0559(10) Uani 1 1 d . . . 
H20 H 0.4784 0.2342 0.0135 0.067 Uiso 1 1 calc R . . 
C21 C 0.4536(4) 0.2733(4) 0.11200(18) 0.0424(8) Uani 1 1 d . . . 
C22 C 0.0857(4) 0.0556(4) 0.1938(2) 0.0531(10) Uani 1 1 d . . . 
H22 H 0.1455 0.0789 0.2394 0.064 Uiso 1 1 calc R . . 
C23 C -0.0154(5) 0.1473(5) 0.1908(3) 0.0843(16) Uani 1 1 d . . . 
H23A H -0.0869 0.1158 0.2245 0.126 Uiso 1 1 calc R . . 
H23B H -0.0729 0.1292 0.1460 0.126 Uiso 1 1 calc R . . 
H23C H 0.0492 0.2556 0.2000 0.126 Uiso 1 1 calc R . . 
C24 C -0.0162(5) -0.1159(5) 0.1854(3) 0.0859(16) Uani 1 1 d . . . 
H24A H -0.0850 -0.1404 0.2203 0.129 Uiso 1 1 calc R . . 
H24B H 0.0486 -0.1741 0.1894 0.129 Uiso 1 1 calc R . . 
H24C H -0.0767 -0.1417 0.1410 0.129 Uiso 1 1 calc R . . 
C25 C 0.6111(4) 0.4004(5) 0.1318(2) 0.0626(11) Uani 1 1 d . . . 
H25 H 0.6124 0.4406 0.1788 0.075 Uiso 1 1 calc R . . 
C26 C 0.6398(6) 0.5322(5) 0.0881(3) 0.0937(17) Uani 1 1 d . . . 
H26A H 0.5569 0.5684 0.0893 0.141 Uiso 1 1 calc R . . 
H26B H 0.6434 0.4983 0.0418 0.141 Uiso 1 1 calc R . . 
H26C H 0.7375 0.6147 0.1052 0.141 Uiso 1 1 calc R . . 
C27 C 0.7376(5) 0.3398(7) 0.1331(4) 0.114(2) Uani 1 1 d . . . 
H27A H 0.8371 0.4235 0.1460 0.171 Uiso 1 1 calc R . . 
H27B H 0.7360 0.2934 0.0884 0.171 Uiso 1 1 calc R . . 
H27C H 0.7210 0.2635 0.1657 0.171 Uiso 1 1 calc R . . 
C28 C 0.1854(8) 0.5212(12) 0.0836(4) 0.053(3) Uani 0.50 1 d P . . 
C29 C 0.1430(12) 0.6536(16) 0.0578(5) 0.108(3) Uani 0.50 1 d PD . . 
C30 C 0.0238(6) 0.6331(5) 0.0087(3) 0.0826(15) Uani 1 1 d D . . 
C31 C -0.1021(12) 0.5912(17) -0.0428(5) 0.108(3) Uani 0.50 1 d PD . . 
C32 C 0.0823(18) 0.5033(11) 0.0404(8) 0.122(7) Uani 0.50 1 d P . . 
 
loop_ 
 _atom_site_aniso_label 
 _atom_site_aniso_U_11 
 _atom_site_aniso_U_22 
 _atom_site_aniso_U_33 
 _atom_site_aniso_U_23 
 _atom_site_aniso_U_13 
 _atom_site_aniso_U_12 
Ti1 0.0460(4) 0.0332(3) 0.0475(4) 0.0058(3) 0.0118(3) 0.0201(3) 
Cl1 0.0673(7) 0.0853(8) 0.0842(9) 0.0307(6) 0.0064(6) 0.0462(6) 
Cl2 0.0633(6) 0.0410(5) 0.1027(9) 0.0136(5) 0.0352(6) 0.0165(5) 
Cl3 0.0854(8) 0.0753(7) 0.0611(7) -0.0123(6) 0.0249(6) 0.0267(6) 
N1 0.0407(15) 0.0351(15) 0.0372(16) 0.0055(12) 0.0030(12) 0.0185(12) 
N2 0.0426(15) 0.0308(14) 0.0326(16) 0.0022(12) 0.0021(12) 0.0178(12) 
N3 0.0390(14) 0.0314(14) 0.0334(16) 0.0028(12) 0.0005(12) 0.0164(11) 
C1 0.0274(15) 0.0311(16) 0.0306(18) 0.0019(14) 0.0002(13) 0.0105(13) 
C2 0.055(2) 0.0332(18) 0.040(2) 0.0010(15) 0.0022(17) 0.0228(16) 
C3 0.054(2) 0.0351(18) 0.040(2) -0.0007(15) -0.0049(16) 0.0250(16) 
C4 0.052(2) 0.0375(18) 0.0301(19) -0.0004(14) -0.0016(15) 0.0237(15) 
C5 0.059(2) 0.0425(19) 0.040(2) 0.0065(16) 0.0072(17) 0.0268(17) 
C6 0.077(3) 0.066(3) 0.038(2) 0.0118(19) 0.008(2) 0.033(2) 
C7 0.079(3) 0.070(3) 0.043(2) 0.006(2) -0.010(2) 0.038(2) 
C8 0.057(2) 0.065(3) 0.046(2) -0.0017(19) -0.0081(19) 0.030(2) 
C9 0.050(2) 0.044(2) 0.036(2) -0.0053(16) -0.0023(16) 0.0203(16) 
C10 0.054(2) 0.058(2) 0.047(2) 0.0113(18) 0.0134(18) 0.0242(18) 
C11 0.089(3) 0.099(4) 0.080(4) 0.001(3) 0.021(3) 0.061(3) 
C12 0.069(3) 0.068(3) 0.167(6) -0.027(3) 0.035(3) 0.014(3) 
C13 0.045(2) 0.064(2) 0.042(2) -0.0051(19) -0.0004(17) 0.0194(18) 
C14 0.071(3) 0.074(3) 0.098(4) 0.033(3) 0.034(3) 0.033(2) 
C15 0.055(2) 0.074(3) 0.087(4) -0.012(3) 0.007(2) 0.027(2) 
C16 0.0415(17) 0.0349(17) 0.0318(19) 0.0023(14) 0.0005(14) 0.0221(14) 
C17 0.0411(18) 0.0362(18) 0.041(2) 0.0008(15) -0.0053(15) 0.0171(15) 
C18 0.054(2) 0.044(2) 0.053(3) -0.0036(18) -0.0140(19) 0.0151(17) 
C19 0.086(3) 0.064(3) 0.037(2) -0.007(2) -0.003(2) 0.036(2) 
C20 0.064(2) 0.066(3) 0.045(2) 0.009(2) 0.015(2) 0.030(2) 
C21 0.0455(19) 0.048(2) 0.038(2) 0.0077(17) 0.0037(16) 0.0231(16) 
C22 0.043(2) 0.058(2) 0.048(2) 0.0047(19) 0.0035(17) 0.0087(17) 
C23 0.079(3) 0.075(3) 0.110(4) 0.010(3) 0.043(3) 0.035(3) 
C24 0.071(3) 0.058(3) 0.128(5) 0.026(3) 0.031(3) 0.017(2) 
C25 0.046(2) 0.071(3) 0.062(3) 0.014(2) 0.0075(19) 0.0115(19) 
C26 0.082(3) 0.059(3) 0.123(5) 0.021(3) 0.005(3) 0.010(2) 
C27 0.045(3) 0.106(4) 0.194(7) 0.050(4) 0.017(3) 0.027(3) 
C28 0.031(4) 0.079(6) 0.045(5) -0.016(4) -0.015(3) 0.022(4) 
C29 0.123(7) 0.152(9) 0.104(8) 0.065(7) 0.052(6) 0.099(7) 
C30 0.102(4) 0.053(3) 0.100(5) 0.005(3) 0.034(3) 0.034(3) 
C31 0.123(7) 0.152(9) 0.104(8) 0.065(7) 0.052(6) 0.099(7) 
C32 0.206(16) 0.041(5) 0.181(16) 0.062(9) 0.168(15) 0.078(9) 
 
_geom_special_details 
; 
 All esds (except the esd in the dihedral angle between two l.s. planes) 
 are estimated using the full covariance matrix.  The cell esds are taken 
 into account individually in the estimation of esds in distances, angles 
 and torsion angles; correlations between esds in cell parameters are only 
 used when they are defined by crystal symmetry.  An approximate (isotropic) 
 treatment of cell esds is used for estimating esds involving l.s. planes. 
; 
 
loop_ 
 _geom_bond_atom_site_label_1 
 _geom_bond_atom_site_label_2 
 _geom_bond_distance 
 _geom_bond_site_symmetry_2 
 _geom_bond_publ_flag 
Ti1 N1 1.731(3) . ? 
Ti1 Cl3 2.2266(13) . ? 
Ti1 Cl1 2.2411(15) . ? 
Ti1 Cl2 2.2415(14) . ? 
N1 C1 1.329(4) . ? 
N2 C1 1.350(4) . ? 
N2 C2 1.390(4) . ? 
N2 C4 1.442(4) . ? 
N3 C1 1.353(4) . ? 
N3 C3 1.393(4) . ? 
N3 C16 1.449(4) . ? 
C2 C3 1.327(5) . ? 
C2 H2 0.9400 . ? 
C3 H3 0.9400 . ? 
C4 C9 1.398(5) . ? 
C4 C5 1.397(5) . ? 
C5 C6 1.392(5) . ? 
C5 C10 1.526(5) . ? 
C6 C7 1.372(5) . ? 
C6 H6 0.9400 . ? 
C7 C8 1.383(5) . ? 
C7 H7 0.9400 . ? 
C8 C9 1.391(5) . ? 
C8 H8 0.9400 . ? 
C9 C13 1.510(5) . ? 
C10 C12 1.512(6) . ? 
C10 C11 1.515(5) . ? 
C10 H10 0.9900 . ? 
C11 H11A 0.9700 . ? 
C11 H11B 0.9700 . ? 
C11 H11C 0.9700 . ? 
C12 H12A 0.9700 . ? 
C12 H12B 0.9700 . ? 
C12 H12C 0.9700 . ? 
C13 C14 1.527(6) . ? 
C13 C15 1.531(5) . ? 
C13 H13 0.9900 . ? 
C14 H14A 0.9700 . ? 
C14 H14B 0.9700 . ? 
C14 H14C 0.9700 . ? 
C15 H15A 0.9700 . ? 
C15 H15B 0.9700 . ? 
C15 H15C 0.9700 . ? 
C16 C21 1.389(4) . ? 
C16 C17 1.390(4) . ? 
C17 C18 1.391(5) . ? 
C17 C22 1.511(5) . ? 
C18 C19 1.376(5) . ? 
C18 H18 0.9400 . ? 
C19 C20 1.369(5) . ? 
C19 H19 0.9400 . ? 
C20 C21 1.391(5) . ? 
C20 H20 0.9400 . ? 
C21 C25 1.513(5) . ? 
C22 C23 1.518(6) . ? 
C22 C24 1.530(5) . ? 
C22 H22 0.9900 . ? 
C23 H23A 0.9700 . ? 
C23 H23B 0.9700 . ? 
C23 H23C 0.9700 . ? 
C24 H24A 0.9700 . ? 
C24 H24B 0.9700 . ? 
C24 H24C 0.9700 . ? 
C25 C26 1.506(6) . ? 
C25 C27 1.511(6) . ? 
C25 H25 0.9900 . ? 
C26 H26A 0.9700 . ? 
C26 H26B 0.9700 . ? 
C26 H26C 0.9700 . ? 
C27 H27A 0.9700 . ? 
C27 H27B 0.9700 . ? 
C27 H27C 0.9700 . ? 
C28 C32 1.191(18) . ? 
C28 C31 1.254(16) 2_565 ? 
C28 C29 1.552(15) . ? 
C29 C30 1.365(8) . ? 
C29 C32 1.331(17) . ? 
C30 C31 1.412(9) . ? 
C30 C32 1.529(16) 2_565 ? 
C30 C32 1.656(12) . ? 
C31 C28 1.254(16) 2_565 ? 
C32 C30 1.529(16) 2_565 ? 
C32 C32 2.11(4) 2_565 ? 
 
loop_ 
 _geom_angle_atom_site_label_1 
 _geom_angle_atom_site_label_2 
 _geom_angle_atom_site_label_3 
 _geom_angle 
 _geom_angle_site_symmetry_1 
 _geom_angle_site_symmetry_3 
 _geom_angle_publ_flag 
N1 Ti1 Cl3 110.08(10) . . ? 
N1 Ti1 Cl1 110.00(10) . . ? 
Cl3 Ti1 Cl1 110.34(6) . . ? 
N1 Ti1 Cl2 108.70(9) . . ? 
Cl3 Ti1 Cl2 109.34(6) . . ? 
Cl1 Ti1 Cl2 108.36(6) . . ? 
C1 N1 Ti1 175.9(2) . . ? 
C1 N2 C2 108.7(3) . . ? 
C1 N2 C4 124.7(3) . . ? 
C2 N2 C4 126.6(3) . . ? 
C1 N3 C3 108.8(3) . . ? 
C1 N3 C16 124.5(3) . . ? 
C3 N3 C16 126.6(3) . . ? 
N1 C1 N2 127.1(3) . . ? 
N1 C1 N3 125.9(3) . . ? 
N2 C1 N3 107.1(3) . . ? 
C3 C2 N2 108.0(3) . . ? 
C3 C2 H2 126.0 . . ? 
N2 C2 H2 126.0 . . ? 
C2 C3 N3 107.4(3) . . ? 
C2 C3 H3 126.3 . . ? 
N3 C3 H3 126.3 . . ? 
C9 C4 C5 124.2(3) . . ? 
C9 C4 N2 117.8(3) . . ? 
C5 C4 N2 118.0(3) . . ? 
C6 C5 C4 116.5(3) . . ? 
C6 C5 C10 121.3(3) . . ? 
C4 C5 C10 122.2(3) . . ? 
C7 C6 C5 121.1(4) . . ? 
C7 C6 H6 119.4 . . ? 
C5 C6 H6 119.4 . . ? 
C6 C7 C8 120.8(4) . . ? 
C6 C7 H7 119.6 . . ? 
C8 C7 H7 119.6 . . ? 
C7 C8 C9 121.2(4) . . ? 
C7 C8 H8 119.4 . . ? 
C9 C8 H8 119.4 . . ? 
C8 C9 C4 116.2(3) . . ? 
C8 C9 C13 121.6(3) . . ? 
C4 C9 C13 122.2(3) . . ? 
C12 C10 C11 110.9(4) . . ? 
C12 C10 C5 110.8(3) . . ? 
C11 C10 C5 112.4(3) . . ? 
C12 C10 H10 107.5 . . ? 
C11 C10 H10 107.5 . . ? 
C5 C10 H10 107.5 . . ? 
C10 C11 H11A 109.5 . . ? 
C10 C11 H11B 109.5 . . ? 
H11A C11 H11B 109.5 . . ? 
C10 C11 H11C 109.5 . . ? 
H11A C11 H11C 109.5 . . ? 
H11B C11 H11C 109.5 . . ? 
C10 C12 H12A 109.5 . . ? 
C10 C12 H12B 109.5 . . ? 
H12A C12 H12B 109.5 . . ? 
C10 C12 H12C 109.5 . . ? 
H12A C12 H12C 109.5 . . ? 
H12B C12 H12C 109.5 . . ? 
C9 C13 C14 111.2(3) . . ? 
C9 C13 C15 113.8(3) . . ? 
C14 C13 C15 109.1(3) . . ? 
C9 C13 H13 107.5 . . ? 
C14 C13 H13 107.5 . . ? 
C15 C13 H13 107.5 . . ? 
C13 C14 H14A 109.5 . . ? 
C13 C14 H14B 109.5 . . ? 
H14A C14 H14B 109.5 . . ? 
C13 C14 H14C 109.5 . . ? 
H14A C14 H14C 109.5 . . ? 
H14B C14 H14C 109.5 . . ? 
C13 C15 H15A 109.5 . . ? 
C13 C15 H15B 109.5 . . ? 
H15A C15 H15B 109.5 . . ? 
C13 C15 H15C 109.5 . . ? 
H15A C15 H15C 109.5 . . ? 
H15B C15 H15C 109.5 . . ? 
C21 C16 C17 124.8(3) . . ? 
C21 C16 N3 117.2(3) . . ? 
C17 C16 N3 118.0(3) . . ? 
C18 C17 C16 115.6(3) . . ? 
C18 C17 C22 122.0(3) . . ? 
C16 C17 C22 122.3(3) . . ? 
C19 C18 C17 121.6(3) . . ? 
C19 C18 H18 119.2 . . ? 
C17 C18 H18 119.2 . . ? 
C20 C19 C18 120.7(4) . . ? 
C20 C19 H19 119.6 . . ? 
C18 C19 H19 119.6 . . ? 
C19 C20 C21 120.9(3) . . ? 
C19 C20 H20 119.6 . . ? 
C21 C20 H20 119.6 . . ? 
C16 C21 C20 116.4(3) . . ? 
C16 C21 C25 122.4(3) . . ? 
C20 C21 C25 121.2(3) . . ? 
C17 C22 C23 110.2(3) . . ? 
C17 C22 C24 113.5(3) . . ? 
C23 C22 C24 109.7(3) . . ? 
C17 C22 H22 107.8 . . ? 
C23 C22 H22 107.8 . . ? 
C24 C22 H22 107.8 . . ? 
C22 C23 H23A 109.5 . . ? 
C22 C23 H23B 109.5 . . ? 
H23A C23 H23B 109.5 . . ? 
C22 C23 H23C 109.5 . . ? 
H23A C23 H23C 109.5 . . ? 
H23B C23 H23C 109.5 . . ? 
C22 C24 H24A 109.5 . . ? 
C22 C24 H24B 109.5 . . ? 
H24A C24 H24B 109.5 . . ? 
C22 C24 H24C 109.5 . . ? 
H24A C24 H24C 109.5 . . ? 
H24B C24 H24C 109.5 . . ? 
C26 C25 C27 112.2(4) . . ? 
C26 C25 C21 112.2(4) . . ? 
C27 C25 C21 111.2(4) . . ? 
C26 C25 H25 106.9 . . ? 
C27 C25 H25 106.9 . . ? 
C21 C25 H25 106.9 . . ? 
C25 C26 H26A 109.5 . . ? 
C25 C26 H26B 109.5 . . ? 
H26A C26 H26B 109.5 . . ? 
C25 C26 H26C 109.5 . . ? 
H26A C26 H26C 109.5 . . ? 
H26B C26 H26C 109.5 . . ? 
C25 C27 H27A 109.5 . . ? 
C25 C27 H27B 109.5 . . ? 
H27A C27 H27B 109.5 . . ? 
C25 C27 H27C 109.5 . . ? 
H27A C27 H27C 109.5 . . ? 
H27B C27 H27C 109.5 . . ? 
C31 C28 C29 103.1(10) 2_565 . ? 
C30 C29 C28 123.8(11) . . ? 
C31 C30 C29 172.4(10) . . ? 
C29 C30 C32 133.5(9) . 2_565 ? 
C31 C30 C32 121.2(9) . . ? 
C30 C31 C28 139.8(13) . 2_565 ? 
C31 C32 C29 144(2) 2_565 . ? 
C28 C32 C30 133.6(10) . 2_565 ? 
C29 C32 C30 149.6(13) . 2_565 ? 
C31 C32 C30 159.6(18) 2_565 . ? 
C28 C32 C30 128.8(12) . . ? 
C31 C32 C32 114.8(17) 2_565 2_565 ? 

loop_
# start Validation Reply Form
_vrf_PLAT773_Moris-212
;
PROBLEM: Suspect C-C Bond in CIF: C32 --C32 ..2.11 Ang. 
RESPONSE: Disorder solvent toluene molecule
;
# end Validation Reply Form


 
_diffrn_measured_fraction_theta_max    0.996 
_diffrn_reflns_theta_full              25.04 
_diffrn_measured_fraction_theta_full   0.996 
_refine_diff_density_max    0.697 
_refine_diff_density_min   -0.312 
_refine_diff_density_rms    0.062 
